# Supplementary material for: Human microRNA-4433 (hsa-miR-4443) Targets 18 Genes to be a Risk Factor of Neurodegenerative Diseases
Source: PubMed Central journal article supplement — Curr Alzheimer Res. 2022 Nov 8;19(7):511–22. doi: 10.2174/1567205019666220805120303 (PMC9906632; doi:10.2174/1567205019666220805120303), 2022-11-08
Supplement: CAR-19-511_SD1.pdf [file CAR-19-511_SD1.pdf]

## Supplementary Materials

# Human microRNA-4433 (hsa-miR-4443) Targets 18 Genes to be a Risk Factor of Neurodegenerative Diseases

Xing Ge<sup>1</sup>, Tingting Yao<sup>1</sup>, Chaoran Zhang<sup>1</sup>, Qingqing Wang<sup>2</sup>, Xuxu Wang<sup>1</sup> and Li-Chun Xu<sup>1,\*</sup>

<sup>1</sup>Department of Pathogen Biology and Immunology, Xuzhou Medical University, Xuzhou, Jiangsu 221002, China;

<sup>2</sup>Nephrology Department, Xuzhou Children's Hospital, Xuzhou, Jiangsu 221000, China

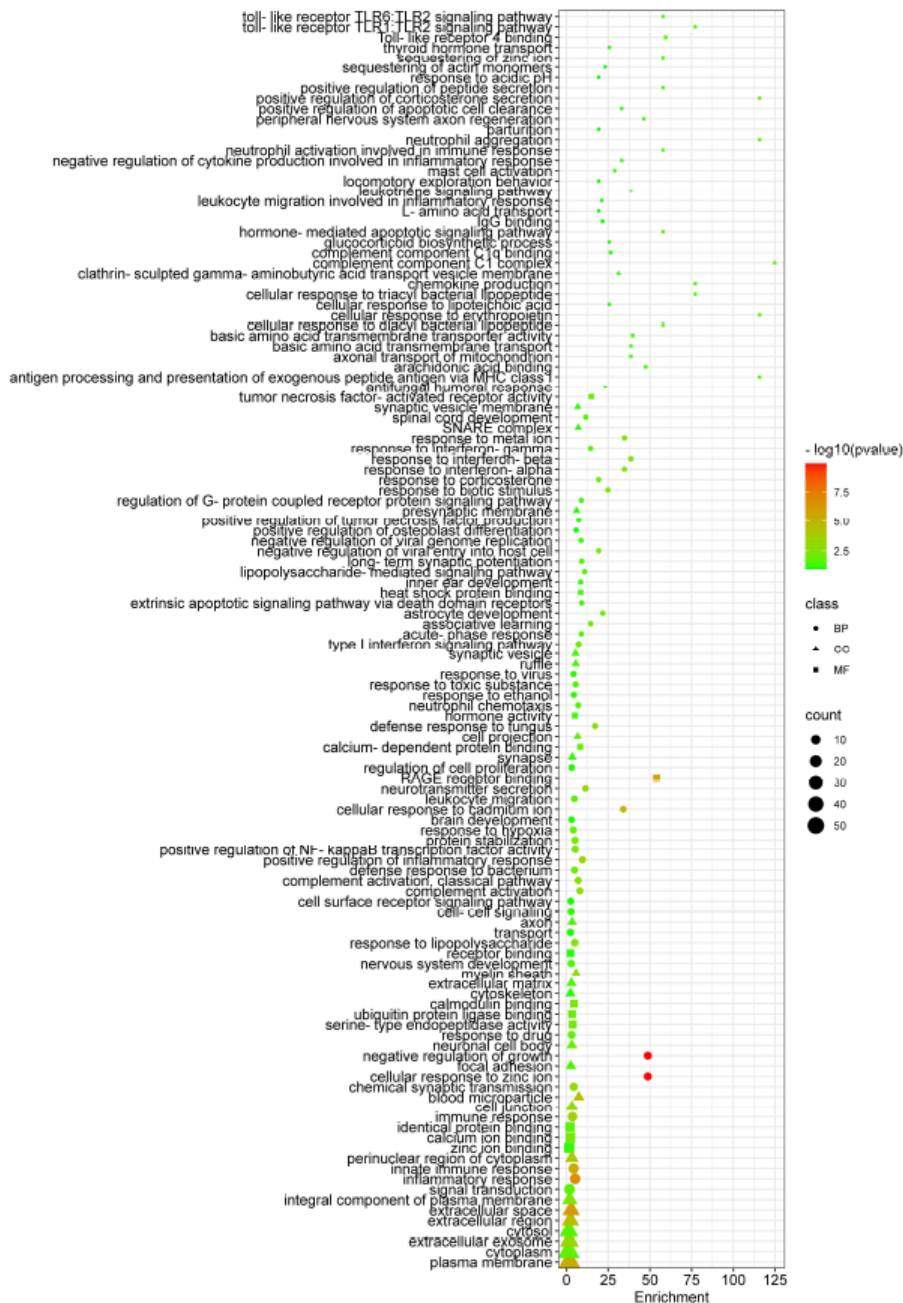

**Fig. (S1).** GO analyses of the co-differentially expressed genes (co-DEGs) in neurodegenerative disease. **Abbreviations:** BP: biological process, CC: cell component, MF: molecular function.

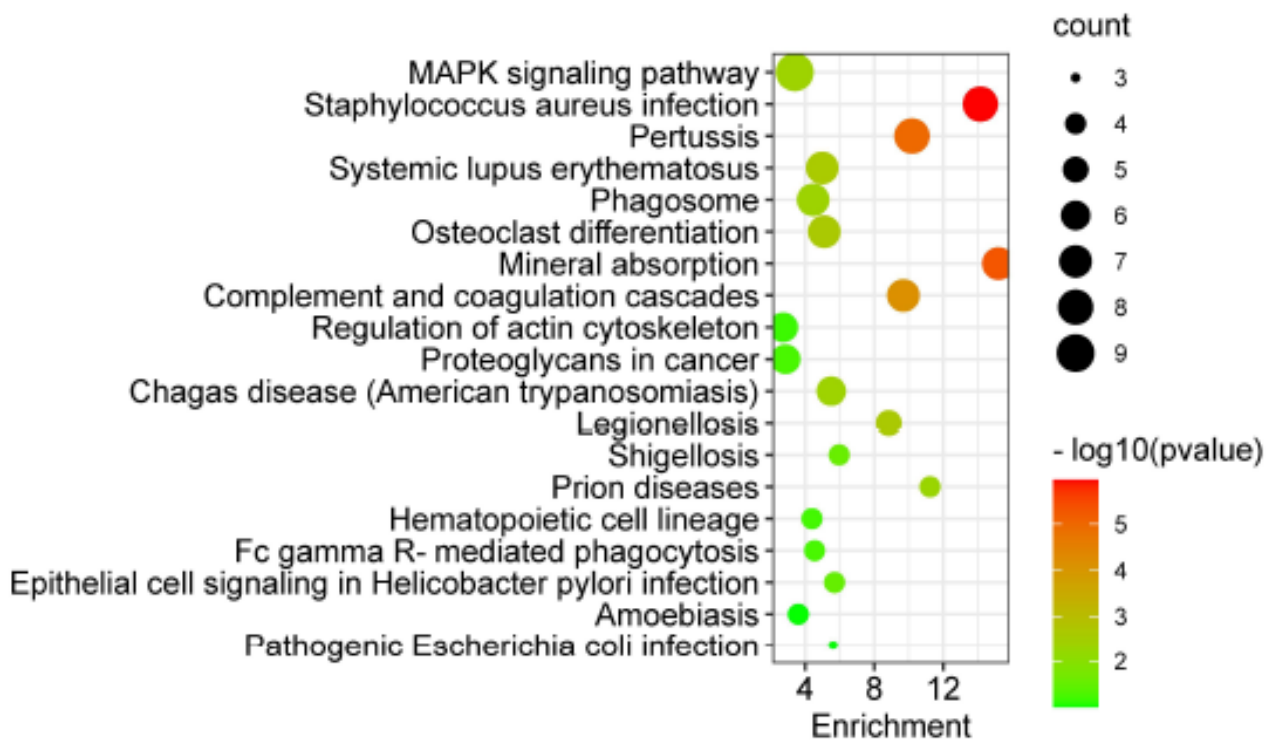

**Fig. (S2).** Enrichment analysis of KEGG pathway of the co-differentially expressed genes (co-DEGs) in neurodegenerative disease.

Table S1. Gene list of Figure 2A.

| name      | ADlogFC      | ADPvalue | HDlogFC      | HDPvalue | UP/Down | Function        |
|-----------|--------------|----------|--------------|----------|---------|-----------------|
| CBLN4     | -0.625963951 | 2.06E-66 | -0.398165312 | 4.31E-24 | Down    | Synapse related |
| DMXL2     | -0.33267104  | 3.41E-47 | -0.321724907 | 8.05E-38 | Down    | Synapse related |
| FGF12     | -0.427138746 | 5.35E-50 | -0.307698531 | 9.13E-27 | Down    | Synapse related |
| GAD1      | -0.563853177 | 2.79E-57 | -0.30800006  | 2.73E-21 | Down    | Synapse related |
| GRIK2     | -0.414548447 | 2.20E-48 | -0.407192074 | 3.16E-39 | Down    | Synapse related |
| SNAP25    | -0.393288652 | 7.79E-55 | -0.378732731 | 2.11E-46 | Down    | Synapse related |
| SST       | -0.630398954 | 1.97E-65 | -0.353483963 | 3.17E-17 | Down    | Synapse related |
| SYN2      | -0.521280668 | 5.95E-48 | -0.379205185 | 1.34E-23 | Down    | Synapse related |
| SYT1      | -0.749051004 | 5.46E-48 | -0.557651085 | 1.07E-27 | Down    | Synapse related |
| TAC1      | -0.485167022 | 3.05E-62 | -0.338131206 | 5.48E-24 | Down    | Synapse related |
| C1QA      | 0.466032557  | 2.23E-57 | 0.455830562  | 1.88E-39 | UP      | Immune related  |
| C1QB      | 0.35387493   | 9.53E-52 | 0.385244645  | 5.38E-41 | UP      | Immune related  |
| C1QC      | 0.38314179   | 2.13E-50 | 0.463037052  | 4.67E-46 | UP      | Immune related  |
| C1R       | 0.397378708  | 6.85E-56 | 0.328026763  | 1.69E-34 | UP      | Immune related  |
| C4A       | 0.582410479  | 4.15E-77 | 0.403966012  | 5.09E-35 | UP      | Immune related  |
| C4B       | 0.583604003  | 4.17E-76 | 0.407914335  | 1.42E-34 | UP      | Immune related  |
| CD14      | 0.33754705   | 8.46E-40 | 0.303501401  | 2.77E-26 | UP      | Immune related  |
| CXCL1     | 0.516416706  | 3.75E-44 | 0.426904892  | 5.94E-23 | UP      | Immune related  |
| FCER1G    | 0.361198496  | 2.11E-53 | 0.335276036  | 2.40E-35 | UP      | Immune related  |
| HAMP      | 0.356341168  | 1.63E-22 | 0.312580322  | 9.39E-15 | UP      | Immune related  |
| IFITM2    | 0.445508384  | 3.87E-52 | 0.369936771  | 2.08E-30 | UP      | Immune related  |
| IFITM3    | 0.437286528  | 3.75E-54 | 0.355621889  | 5.30E-30 | UP      | Immune related  |
| RGS1      | 0.595260588  | 1.21E-37 | 0.358996521  | 3.17E-12 | UP      | Immune related  |
| S100A12   | 0.506664511  | 5.01E-31 | 0.479028423  | 1.16E-28 | UP      | Immune related  |
| S100A8    | 0.728612285  | 4.31E-41 | 0.707960944  | 1.58E-34 | UP      | Immune related  |
| S100A9    | 0.652855886  | 5.94E-42 | 0.652340911  | 7.16E-36 | UP      | Immune related  |
| TLR2      | 0.483233819  | 3.31E-66 | 0.38351121   | 4.68E-35 | UP      | Immune related  |
| TNFRSF10D | 0.53029634   | 1.93E-66 | 0.439402646  | 1.16E-41 | UP      | Immune related  |
| TNFRSF11B | 0.582188454  | 1.84E-63 | 0.389521073  | 2.23E-26 | UP      | Immune related  |
| TNFRSF1A  | 0.356308614  | 2.08E-65 | 0.305092563  | 8.89E-39 | UP      | Immune related  |
| TYROBP    | 0.331007725  | 1.93E-47 | 0.345124239  | 3.14E-36 | UP      | Immune related  |

**Table S2 Gene list of Figure 3B-C**

| <b>name</b> | <b>ADlogFC</b> | <b>ADPvalue</b> | <b>HDlogFC</b> | <b>HDPvalue</b> | <b>UP/Down</b> | <b>Module</b> | <b>Function</b> |
|-------------|----------------|-----------------|----------------|-----------------|----------------|---------------|-----------------|
| C1QA        | 0.466032557    | 2.23E-57        | 0.455830562    | 1.88E-39        | UP             | Blue          | Immune related  |
| C1QB        | 0.35387493     | 9.53E-52        | 0.385244645    | 5.38E-41        | UP             | Blue          | Immune related  |
| C1QC        | 0.38314179     | 2.13E-50        | 0.463037052    | 4.67E-46        | UP             | Blue          | Immune related  |
| C1R         | 0.397378708    | 6.85E-56        | 0.328026763    | 1.69E-34        | UP             | Blue          | Immune related  |
| C4A         | 0.582410479    | 4.15E-77        | 0.403966012    | 5.09E-35        | UP             | Blue          | Immune related  |
| C4B         | 0.583604003    | 4.17E-76        | 0.407914335    | 1.42E-34        | UP             | Blue          | Immune related  |
| CD14        | 0.33754705     | 8.46E-40        | 0.303501401    | 2.77E-26        | UP             | Blue          | Immune related  |
| CD163       | 0.452493951    | 2.30E-53        | 0.328062683    | 3.26E-33        | UP             | Blue          | Immune related  |
| CD44        | 0.50652419     | 2.20E-47        | 0.338090417    | 6.28E-21        | UP             | Blue          | Immune related  |
| CES1        | 0.421973487    | 2.75E-35        | 0.317978043    | 1.85E-21        | UP             | Blue          | Immune related  |
| CHI3L1      | 0.414236528    | 2.66E-33        | 0.307743888    | 1.08E-16        | UP             | Blue          | Immune related  |
| CRABP1      | 0.40954929     | 2.72E-21        | 0.373674603    | 1.26E-18        | UP             | Blue          | Immune related  |
| CXCL1       | 0.516416706    | 3.75E-44        | 0.426904892    | 5.94E-23        | UP             | Blue          | Immune related  |
| FCER1G      | 0.361198496    | 2.11E-53        | 0.335276036    | 2.40E-35        | UP             | Blue          | Immune related  |
| HAMP        | 0.356341168    | 1.63E-22        | 0.312580322    | 9.39E-15        | UP             | Blue          | Immune related  |
| IFI30       | 0.416485785    | 1.10E-48        | 0.322553428    | 5.44E-24        | UP             | Blue          | Immune related  |
| IFITM1      | 0.424344285    | 5.59E-61        | 0.388029431    | 2.86E-40        | UP             | Blue          | Immune related  |
| IFITM2      | 0.445508384    | 3.87E-52        | 0.369936771    | 2.08E-30        | UP             | Blue          | Immune related  |
| IL1R2       | 0.374121064    | 1.51E-35        | 0.316558841    | 3.36E-27        | UP             | Blue          | Immune related  |
| S100A12     | 0.506664511    | 5.01E-31        | 0.479028423    | 1.16E-28        | UP             | Blue          | Immune related  |
| S100A8      | 0.728612285    | 4.31E-41        | 0.707960944    | 1.58E-34        | UP             | Blue          | Immune related  |
| S100A9      | 0.652855886    | 5.94E-42        | 0.652340911    | 7.16E-36        | UP             | Blue          | Immune related  |

| name      | ADlogFC      | ADPvalue | HDlogFC      | HDPvalue | UP/Down | Module    | Function        |
|-----------|--------------|----------|--------------|----------|---------|-----------|-----------------|
| TLR2      | 0.483233819  | 3.31E-66 | 0.38351121   | 4.68E-35 | UP      | Blue      | Immune related  |
| TNFRSF11B | 0.582188454  | 1.84E-63 | 0.389521073  | 2.23E-26 | UP      | Blue      | Immune related  |
| TNFRSF1A  | 0.356308614  | 2.08E-65 | 0.305092563  | 8.89E-39 | UP      | Blue      | Immune related  |
| TYROBP    | 0.331007725  | 1.93E-47 | 0.345124239  | 3.14E-36 | UP      | Blue      | Immune related  |
| CRH       | -0.978322323 | 4.29E-89 | -0.511880721 | 6.99E-21 | Down    | Turquoise | Synapse related |
| SYT1      | -0.749051004 | 5.46E-48 | -0.557651085 | 1.07E-27 | Down    | Turquoise | Synapse related |
| SST       | -0.630398954 | 1.97E-65 | -0.353483963 | 3.17E-17 | Down    | Turquoise | Synapse related |
| GAD1      | -0.563853177 | 2.79E-57 | -0.30800006  | 2.73E-21 | Down    | Turquoise | Synapse related |
| SLC4A10   | -0.529607639 | 2.20E-40 | -0.395948635 | 7.19E-22 | Down    | Turquoise | Synapse related |
| SYN2      | -0.521280668 | 5.95E-48 | -0.379205185 | 1.34E-23 | Down    | Turquoise | Synapse related |
| TAC1      | -0.485167022 | 3.05E-62 | -0.338131206 | 5.48E-24 | Down    | Turquoise | Synapse related |
| GABRG2    | -0.466060557 | 1.59E-44 | -0.315081183 | 3.66E-24 | Down    | Turquoise | Synapse related |
| UCHL1     | -0.432132863 | 3.43E-49 | -0.325742535 | 1.29E-28 | Down    | Turquoise | Synapse related |
| FGF12     | -0.427138746 | 5.35E-50 | -0.307698531 | 9.13E-27 | Down    | Turquoise | Synapse related |
| NRXN3     | -0.422938279 | 1.61E-63 | -0.317405407 | 1.25E-38 | Down    | Turquoise | Synapse related |
| GRIK2     | -0.414548447 | 2.20E-48 | -0.407192074 | 3.16E-39 | Down    | Turquoise | Synapse related |
| CDC42     | -0.394709765 | 2.43E-55 | -0.304041204 | 5.57E-35 | Down    | Turquoise | Synapse related |
| SNAP25    | -0.393288652 | 7.79E-55 | -0.378732731 | 2.11E-46 | Down    | Turquoise | Synapse related |
| ATP6V1A   | -0.341298824 | 1.90E-30 | -0.406277765 | 1.48E-34 | Down    | Turquoise | Synapse related |
| DMXL2     | -0.33267104  | 3.41E-47 | -0.321724907 | 8.05E-38 | Down    | Turquoise | Synapse related |
| GNG2      | -0.304259583 | 1.98E-43 | -0.32349899  | 6.62E-35 | Down    | Turquoise | Synapse related |
| APOD      | 0.341773751  | 2.37E-26 | 0.372888981  | 2.10E-31 | UP      | Turquoise | Synapse related |
